# Supplementary material for: Tivantinib, A c-Met Inhibitor in Clinical Trials, Is Susceptible to ABCG2-Mediated Drug Resistance
Source: PubMed Central journal article supplement (PMC7017082; doi:10.3390/cancers12010186), 2020-01-12
Supplement: cancers-12-00186-s001.pdf [file cancers-12-00186-s001.pdf]

## Supplementary Materials: Tivantinib, A c-Met Inhibitor in Clinical Trials, Is Susceptible to ABCG2-Mediated Drug Resistance

Zhuo-Xun Wu, Yuqi Yang, Qiu-Xu Teng, Jing-Quan Wang, Zi-Ning Lei, Jing-Qiu Wang, Sabrina Lusvardhi, Suresh V. Ambudkar, Dong-Hua Yang and Zhe-Sheng Chen

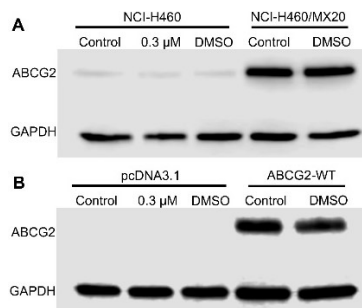

**Figure S1.** The protein expression in cells overexpressing ABCG2 (A) The protein expression of ABCG2 in NCI-H460 and NCI-H460/MX20 cells treated with 0.3 μM of tivantinib or 0.003% (*v/v*) DMSO for 72 h. (B) The protein expression of ABCG2 in HEK293/pcDNA3.1 and HEK293/ABCG2-WT cells treated with 0.3 μM of tivantinib or DMSO for 72 h.

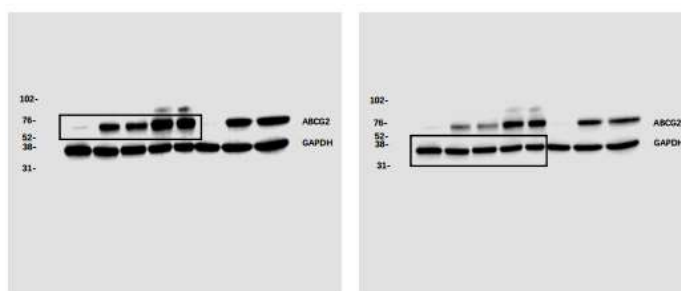

| IntDen                 | H460   | MX20-0 h | MX20-24 h | MX20-48 h | MX20-72 h |
|------------------------|--------|----------|-----------|-----------|-----------|
| ABCG2                  | 7217   | 265585   | 261276    | 438594    | 372669    |
| GAPDH                  | 503135 | 445402   | 423633    | 383888    | 323347    |
| Relative intensity (%) | 1.4344 | 59.6282  | 61.6751   | 114.2505  | 115.2536  |

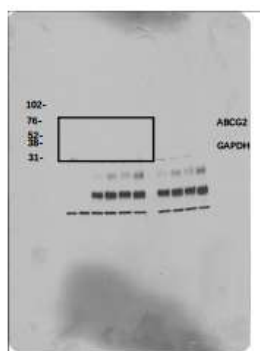

| IntDen                 | pcDNA3.1 | ABCG2-0 h | ABCG2-24 h | ABCG2-48 h | ABCG2-72 h |
|------------------------|----------|-----------|------------|------------|------------|
| ABCG2                  | 900      | 313281    | 381655     | 366244     | 399393     |
| GAPDH                  | 142921   | 145188    | 154545     | 157643     | 134059     |
| Relative intensity (%) | 0.629719 | 215.7761  | 246.954    | 232.3249   | 297.9233   |

**Figure S2.** Western blot for Figure 4.

**Table S1.** The effect of tivantinib on cytotoxicity of cisplatin in cells overexpressing ABCG2.

| Cell Line          | IC <sub>50</sub> ± SD <sup>a</sup> μM, (Resistance-fold <sup>b</sup> ) |                        |                               |
|--------------------|------------------------------------------------------------------------|------------------------|-------------------------------|
|                    | Cisplatin                                                              | Cisplatin + Ko143 5 μM | Cisplatin + Tivantinib 0.3 μM |
| NCI-H460           | 3.900 ± 0.664 (1.00)                                                   | 4.037 ± 0.503 (1.04)   | 5.125 ± 0.329 (1.31)          |
| NCI-H460/MX20      | 3.991 ± 0.187 (1.02)                                                   | 4.750 ± 0.213 (1.22)   | 3.894 ± 0.377 (1.00)          |
| HEK293/pcDNA3.1    | 6.482 ± 0.640 (1.00)                                                   | 8.306 ± 1.238 (1.28)   | 6.820 ± 0.521 (1.05)          |
| HEK293/ABCG2-WT    | 7.491 ± 1.022 (1.16)                                                   | 7.094 ± 0.240 (1.70)   | 8.603 ± 1.321 (1.33)          |
| HEK293/ABCG2-R482G | 6.672 ± 1.159 (1.03)                                                   | 8.335 ± 0.565 (1.29)   | 6.860 ± 0.223 (1.06)          |
| HEK293/ABCG2-R482T | 7.462 ± 1.192 (1.15)                                                   | 9.098 ± 0.648 (1.40)   | 8.898 ± 0.280 (1.37)          |

<sup>a</sup> IC<sub>50</sub> values are represented as mean ± SD of at least three independent experiments performed in triplicate. <sup>b</sup> Rf: Resistance-fold was calculated by dividing the IC<sub>50</sub> values of ABC transporter overexpressing cells by the IC<sub>50</sub> of the corresponding parental cells in the presence of cisplatin and in the absence of Ko143 or tivantinib. \* *p* < 0.05 versus the control group.

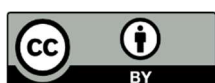

© 2020 by the authors. Licensee MDPI, Basel, Switzerland. This article is an open access article distributed under the terms and conditions of the Creative Commons Attribution (CC BY) license (<http://creativecommons.org/licenses/by/4.0/>).
